# Supplementary material for: Heterogeneous formation and light absorption of secondary organic aerosols from acetone photooxidation: Remarkably enhancing effects of seeds and ammonia
Source: Copernicus journal article supplement (doi:10.5194/egusphere-2024-2119), 2024-07-18
Supplement: Supplementary file 1 [file egusphere-2024-2119-supplement.pdf]

1 *Supporting Information*

2  
3 Heterogeneous formation and light absorption of secondary organic  
4 aerosols from acetone photooxidation: Remarkably enhancing effects  
5 of seeds and ammonia

6  
7  
8 Si Zhang<sup>1</sup>, Xinbei Xu<sup>1</sup>, Luyao Chen<sup>1</sup>, Can Wu<sup>1,2</sup>, Zheng Li<sup>1</sup>, Rongjie Li<sup>1</sup>, Binyu Xiao<sup>1</sup>,  
9 Xiaodi Liu<sup>1</sup>, Rui Li<sup>1,2</sup>, Fan Zhang<sup>1,2</sup>, Gehui Wang<sup>1,2\*</sup>

10  
11  
12 <sup>1</sup>Key Lab of Geographic Information Science of the Ministry of Education, School of  
13 Geographic Sciences, East China Normal University, Shanghai 200241, China

14 <sup>2</sup>Institute of Eco-Chongming, 20 Cuiniao Rd., Chongming, Shanghai 202150, China

15  
16  
17  
18 \*Corresponding author: Prof. Gehui Wang, Email: [ghwang@geo.ecnu.edu.cn](mailto:ghwang@geo.ecnu.edu.cn)

19 Tel: 86-21-54341193, Fax: 86-21-54341122

20  
21  
22  
23 This PDF file includes:

- 24 1. Supplementary Text S1-S6
- 25 2. Seven figures, Figure S1-S8
- 26 3. Three tables, Table S1-S3
- 27 4. References

31 **Text S1. Particle wall loss correction**

32 The particle wall loss was corrected by using a total-mass-concentration-based method  
33 (Liu and Abbatt, 2021). The wall-loss-corrected sulfate concentration at time  $t$   $wC_{\text{so}_4^{2-}}(t)$   
34 can be calculated using the Eq.(1).

35 
$$wC_{\text{so}_4^{2-}}(t) = C_{\text{so}_4^{2-}}^{\text{SUS}}(t) + k \int_0^t C_{\text{so}_4^{2-}}^{\text{SUS}}(t) dt \quad (1)$$

36 where  $C_{\text{so}_4^{2-}}^{\text{SUS}}(t)$  is the measured sulfate concentration at time  $t$ , and  $k$  is the first order  
37 particles wall loss rate constant,  $1 \times 10^{-4} \text{ s}^{-1}$  in this study. The wall loss rate constants of pure  
38  $(\text{NH}_4)_2\text{SO}_4$  seed and  $\text{NH}_4\text{NO}_3$  seed were similar under the experimental conditions in this  
39 work.

40 **Text S2.  $\text{NH}_3$  concentration wall loss correction**

41 According to the reports of Huang et al. (2018) and Zhang et al. (2014), the vapor wall  
42 loss of gas compounds in Teflon-walled chambers can be estimated by a two-layer model, and  
43 the overall mass transport coefficient across the gas-phase boundary layer and the air-Teflon  
44 interface can be calculated by Eq.2-4. Then the first-order wall loss coefficient ( $k_w$ ) can be  
45 calculated by Eq.5. Therefore, the loss of  $\text{NH}_3$  to the chamber wall is estimated by the  $k_w$  by  
46 considering the gas-phase transport within the chamber, as reported by Zhang et al. (2014)

$$v_1 = \left( \frac{1}{v_e} + \frac{1}{v_c} \right)^{-1} \quad (2)$$

$$v_e = \frac{2}{\pi} \sqrt{k_e \mathcal{D}_g} \quad (3)$$

$$v_c = \frac{\alpha_w \omega}{4} \quad (4)$$

$$k_w = \left( \frac{A}{V} \right) v_1 = \left( \frac{A}{V} \right) \frac{\alpha_w \omega}{4 + \frac{\pi}{2} \left( \frac{\alpha_w \omega}{\sqrt{k_e \mathcal{D}_g}} \right)} \quad (5)$$

47 where  $A/V$  is the surface-to-volume ratio of the chamber;  $\alpha_w$  is the mass accommodation  
48 coefficient of  $\text{NH}_3$  onto the Teflon chamber walls at  $\text{RH} = 90\%$  (0.01) (Bongartz et al., 1995);  
49  $\omega$  is the mean molecular speed of  $\text{NH}_3$  ( $603 \text{ m s}^{-1}$ ) (Seinfeld and Pandis, 2006);  $k_e$  is the

50 coefficient of eddy diffusion and is estimated to be 0.31 for the chamber used in this work;  $D_g$   
 51 is the gas-phase diffusion coefficient ( $1.98 \times 10^{-5}$ ) (Tang et al., 2014).

52 Therefore, the loss of  $\text{NH}_3$  to the chamber wall is estimated by the  $k_w$  by considering the  
 53 gas-phase transport within the chamber (Zhang et al., 2014). The average concentration of  
 54  $\text{NH}_3$  is estimated by eq. 6,

$$[\text{NH}_3] = \frac{1 - e^{-k_w \Delta t}}{k_w \Delta t} [\text{NH}_3]_0 \quad (6) \quad 55$$

56 where the first-order wall-loss coefficient ( $k_w$ ) of  $\text{NH}_3$  in this study is  $9.5 \times 10^{-3} \text{ s}^{-1}$  and  $\Delta t$  is  
 57 the reaction time. For an initial injection concentration of 1250 ppbv  $\text{NH}_3$ , the average  
 58 concentration of  $\text{NH}_3$  in the chamber was corrected to be 73 ppbv.

59 **Text S3. VOCs concentration wall loss correction and estimation of MGly concentration**

60 The vapor wall loss coefficients of VOCs in chamber were also calculated by Eq.2. The  
 61 values of  $\alpha_w$ ,  $k_e$ ,  $\omega$  and  $D_g$  of VOCs were calculated by eq.7-10, respectively (Huang et al.,  
 62 2018).

$$\alpha_w = 10^{-2.744(c^*)^{-0.6566}} \quad (7)$$

$$\log_{10} c^* = (n_C^0 - n_C) b_C - n_O b_O - 2 \frac{n_C n_O}{n_C + n_O} b_{CO} - n_N b_N - n_S b_S, \quad (8)$$

$$k_e = 0.004 + 10^{-2.25(V)^{0.74}} \quad (9)$$

$$\omega = \sqrt{\frac{8RT}{\pi MW_{\text{VOC}}}} \quad (10)$$

63 where  $c^*$  is the vapor saturation concentration of VOCs, and the calculation method and all  
 64 parameters were explained in detail by Li et al. (2016); R is the gas constant,  $8.314 \text{ (kg m}^2 \text{ s}^{-2}$   
 65  $\text{K}^{-1} \text{ mol}^{-1})$ ; T is the temperature;  $MW_{\text{VOC}}$  is the vapor molecular weight of VOCs;  $D_g$  of VOCs  
 66 were referred to the results of Tang et al. (2015).

67 In this study, the concentrations of MGly measured by PTR-MS were the equilibrium  
 68 concentrations after gas-particle partitioning and multiphase reactions, which would  
 69 underestimate the contribution of MGLY in the SOA formation. Hence, the total

70 concentrations of MGly in gas phase were estimated through the molar yield (14%) of MGLY  
71 in acetone-OH oxidation reported by Fu et al. (2008). Then the total concentrations of MGly  
72 were vapor wall loss corrected by  $k_w$ .

#### 73 **Text S4. Concentration of OH radicals**

74 In this study, the concentration of OH was estimated from exponential fitting of the  
75 measured decay of acetone concentration (eq.11-12) (Li et al., 2021a)

$$[\text{Acetone}] = [\text{Acetone}]_0 e^{-k_2 t} \quad (11)$$

$$[\text{OH}] = \frac{k_2}{k_1} \quad (12)$$

76 where  $[\text{Acetone}]_0$  is the initial concentration of acetone and  $k_2$  is the fitted pseudo first-order  
77 rate constant for the acetone-OH reaction, and  $k_1$  ( $5.5 \times 10^{-12} \text{ cm}^3 \text{ molecule}^{-1} \text{ s}^{-1}$ ) is the reaction  
78 rate between OH and acetone. The calculated concentrations of  $[\text{OH}]$  are about  $5.3 \times 10^8$   
79 molecules  $\text{cm}^{-3}$ .

#### 80 **Text S5. The calculation of the MAC of SOA**

81 In this study, the light absorption coefficient ( $\text{Abs}_\lambda$ ,  $\text{M m}^{-1}$ ) and the mass absorption  
82 coefficient ( $\text{MAC}_\lambda$ ,  $\text{m}^2 \text{ g}^{-1}$ ) at the wavelength of  $\lambda$  of SOA were calculated using eq.13 and 14,  
83 respectively (Liu et al., 2023).

$$\text{Abs}_\lambda = (A_\lambda - A_{700}) \frac{V_w}{V_a \times l} \times \ln(10) \quad (13)$$

$$\text{MAC}_\lambda = \frac{\text{Abs}_\lambda}{M} \quad (14)$$

84 where  $A_\lambda$  and  $A_{700}$  represent the light absorption at the wavelengths of  $\lambda$  and 700 nm measured  
85 by LWCC, respectively;  $V_w$  and  $V_a$  represent the volume of solvent and the volume of air  
86 corresponding to the filter punch, respectively; and  $l$  is the absorbing path length (1 m);  $M$  is  
87 the concentration of water-soluble organic carbon (WSOC,  $\mu\text{gC m}^{-3}$ ).

#### 88 **Text S6. The calculation of the partition coefficients of $\text{NH}_3$ ( $\epsilon(\text{NH}_4^+)$ )**

89 The partition coefficients of  $\text{NH}_3$  ( $\epsilon(\text{NH}_4^+)$ ) on different seeds were calculated by eq.15  
90 and 16 (Guo et al., 2017; Nah et al., 2018).

$$\varepsilon(\text{NH}_4^+) \cong \frac{\frac{\gamma_{\text{H}^+} 10^{-\text{pH}}}{\gamma_{\text{NH}_4^+}} H_{\text{NH}_3}^* W_i R T \times 0.987 \times 10^{-14}}{1 + \frac{\gamma_{\text{H}^+} 10^{-\text{pH}}}{\gamma_{\text{NH}_4^+}} H_{\text{NH}_3}^* W_i R T \times 0.987 \times 10^{-14}} \quad (15)$$

$$\ln (H_{\text{NH}_3}^*) = 25.393 - 10373.6(1/T_r - 1/T) + 4.131(T_r/T - (1 + \ln (T_r/T))) \quad (16)$$

91 where  $\gamma_{\text{H}^+}$  and  $\gamma_{\text{NH}_4^+}$  are activity coefficients of  $\text{H}^+$  and  $\text{NH}_4^+$ , respectively, calculated from  
 92 E-AIM model;  $H_{\text{NH}_3}^*$  is equilibrium constants calculated by eq.16; R is the gas constant; T is  
 93 temperature;  $W_i$  is particle liquid water content associated with inorganic species.  
 94

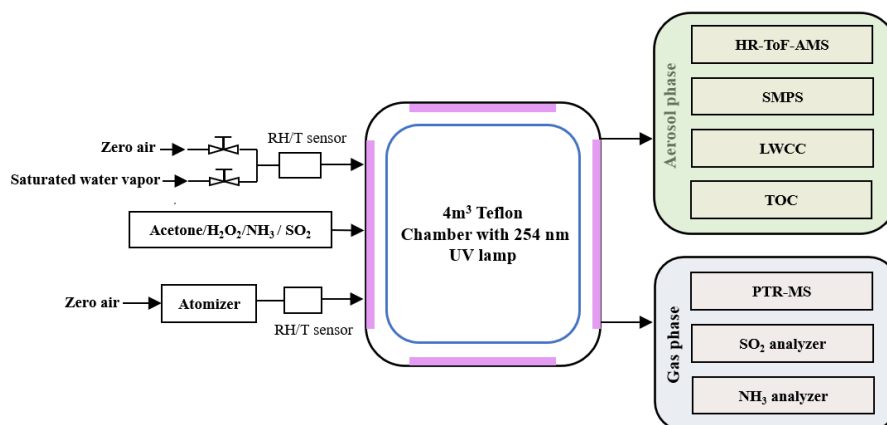

95  
96  
97  
98

**Figure S1.** A schematic diagram of experimental setup in this work

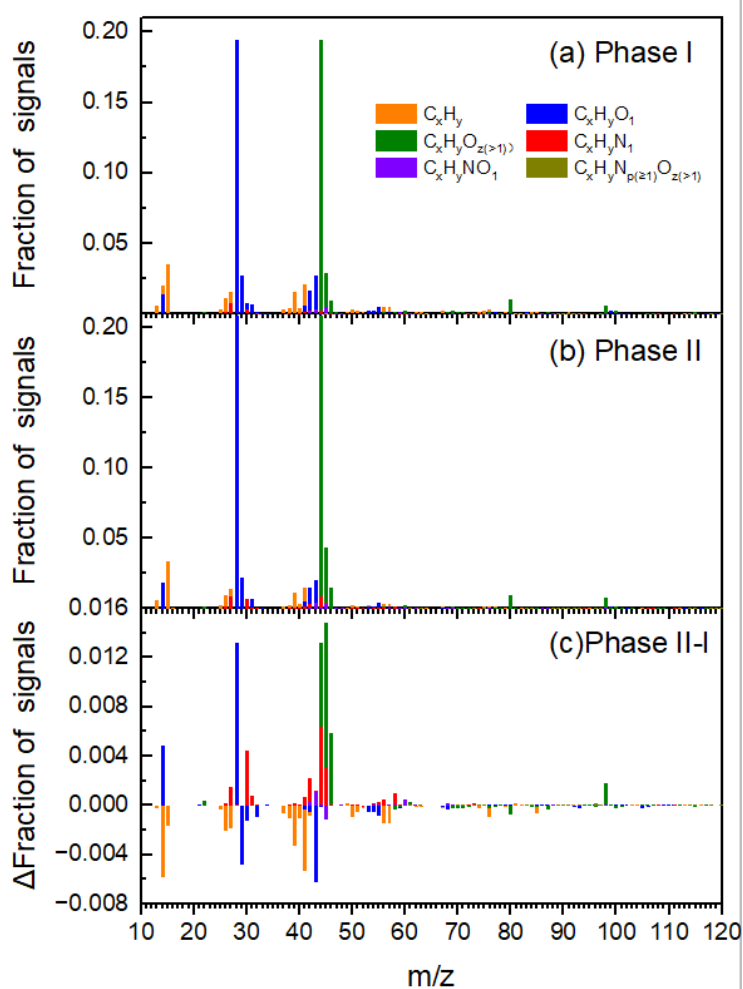

99  
100  
101  
102  
103

**Figure S2.** The mass spectra of acetone-derived SOA measured by HR-AMS during the Phase I and Phase II (a and b) and their difference between the two phases (c). Data were taken and analyzed at a high resolution but were summarized to a unit mass resolution for display.

104

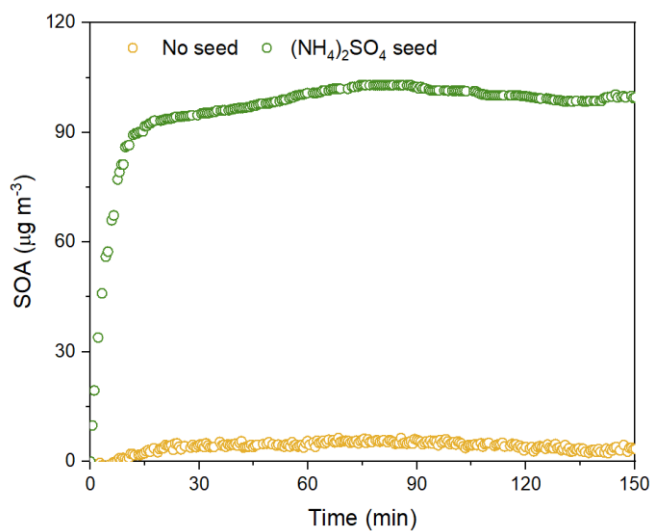

105

106 **Figure S3.** Concentrations of acetone-derived SOA in the chamber during the Phase I  
107 as a function of reaction time in the absence and presence of  $(\text{NH}_4)_2\text{SO}_4$  seeds,  
108 respectively.

109

110

111

112

113

114

115

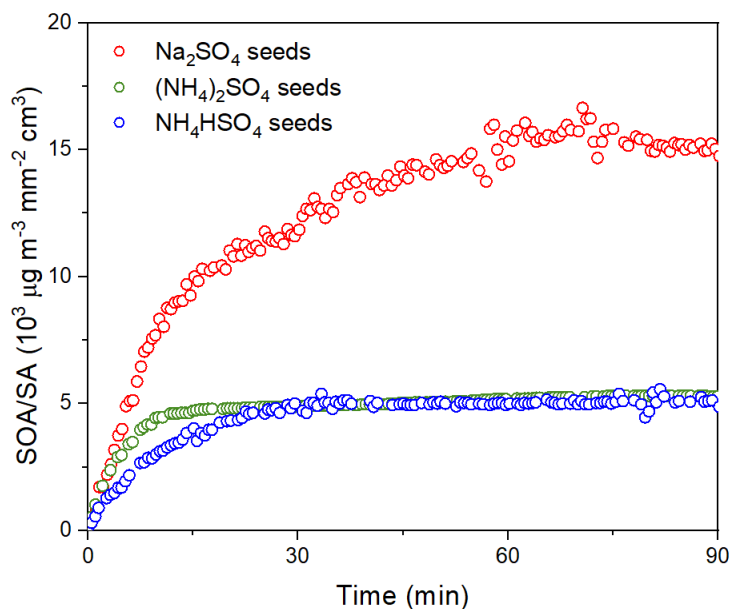

116

117 **Figure S4.** Normalized concentrations of SOA to the surface area (SA) of different  
118 seeds at Phase I as a function of reaction time during the exposure of various seeds to  
119 750 ppb acetone and  $5.3 \times 10^8$  molecules  $\text{cm}^{-3}$  OH radicals under 85% RH.

120

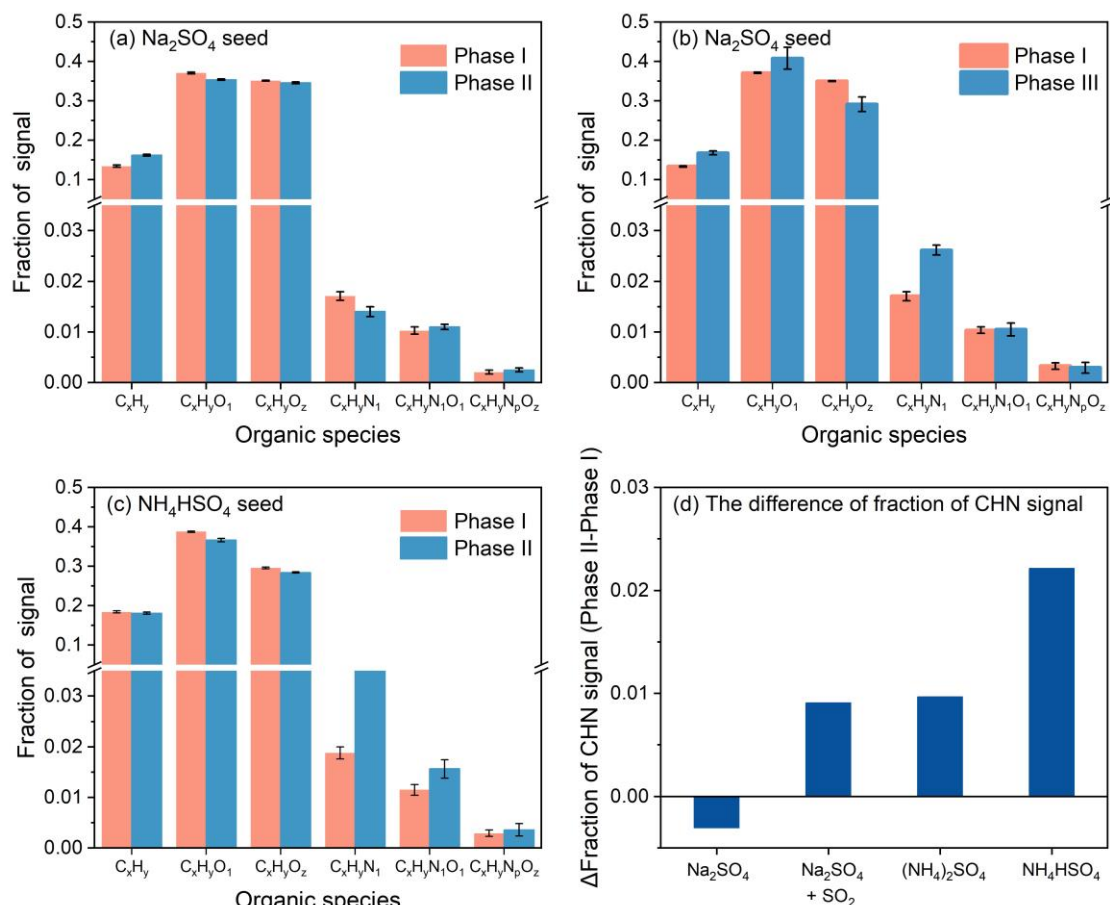

121

122 **Figure S5.** (a-c) The fraction of various organic species family signal of acetone-  
 123 derived SOA at different reaction phases. (Phase I: Photooxidation of acetone by OH  
 124 radicals without NH<sub>3</sub>; Phase II: Reaction of acetone oxidation products with NH<sub>3</sub>  
 125 under dark conditions; Phase III: Addition of 500 ppb SO<sub>2</sub> into the chamber after  
 126 Phase II in the presence of Na<sub>2</sub>SO<sub>4</sub> seeds); (d) The enhancement of the fraction of  
 127 CHN ions family of Phase II over Phase I on different seeds (the value on Na<sub>2</sub>SO<sub>4</sub>  
 128 seed with SO<sub>2</sub> is the enhancement of Phase III over Phase I).

129

130

131



132

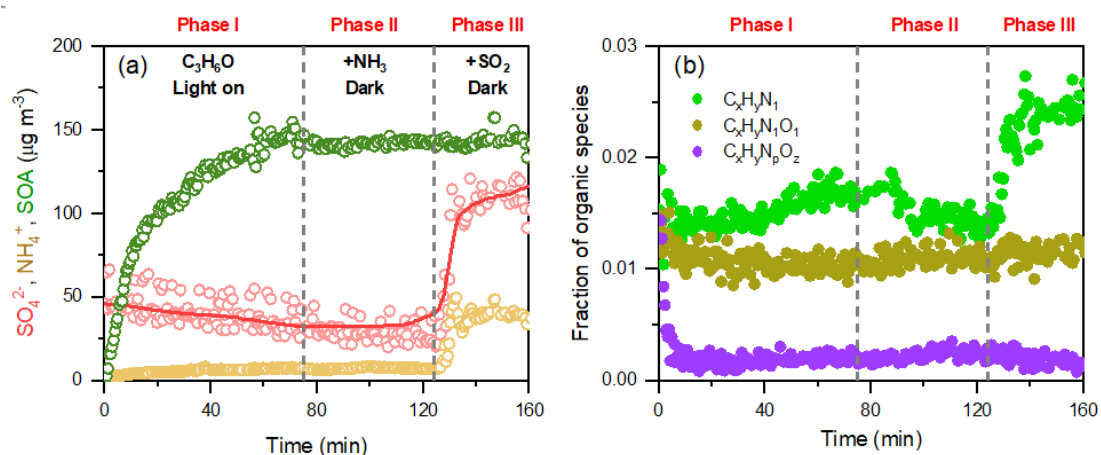

133

134 **Figure S6.** (a) The mass concentration of SOA, NH<sub>4</sub><sup>+</sup> and SO<sub>4</sub><sup>2-</sup> during the reaction  
135 given by HR-ToF-AMS, which were corrected according to the results of SMPS; (b)  
136 The variations of fractions of N-containing organic species signals during the reaction  
137 on Na<sub>2</sub>SO<sub>4</sub> seed with NH<sub>3</sub> and SO<sub>2</sub>.

138

139

140

141

142

143

144

145

146

147

148

149

150

151

152

153

154

155

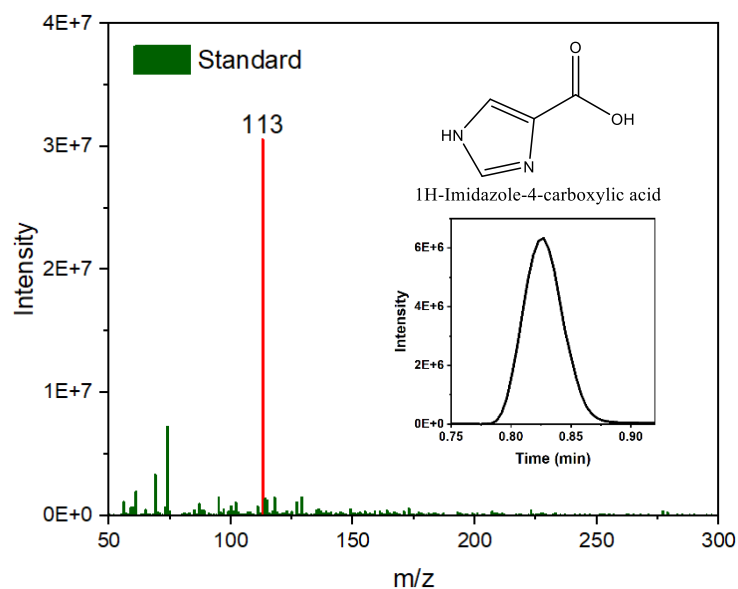

156

157 **Figure S7.** The ESI-Orbitrap MS spectra of the 1H-Imidazole-4-carboxylic acid  
158 standard.

159

160 **Table S1.** Initial conditions of the experiments

| Exp. No. | Acetone<br>(ppb) | OH <sup>a</sup><br>(molecules cm <sup>-3</sup> ) | NH <sub>3</sub><br>(ppb) | SO <sub>2</sub><br>(ppb) | Seeds                                           | RH<br>(%) |
|----------|------------------|--------------------------------------------------|--------------------------|--------------------------|-------------------------------------------------|-----------|
| 1        | 750              | 5.3 × 10 <sup>8</sup>                            | 73                       | /                        | (NH <sub>4</sub> ) <sub>2</sub> SO <sub>4</sub> | 85±1      |
| 2        | 750              | 5.3 × 10 <sup>8</sup>                            | 73                       | /                        | (NH <sub>4</sub> )HSO <sub>4</sub>              | 85±1      |
| 3        | 750              | 5.3 × 10 <sup>8</sup>                            | 73                       | /                        | Na <sub>2</sub> SO <sub>4</sub>                 | 85±1      |
| 4        | 750              | 5.3 × 10 <sup>8</sup>                            | 73                       | 500                      | Na <sub>2</sub> SO <sub>4</sub>                 | 85±1      |
| 5        | 750              | 5.4 × 10 <sup>8</sup>                            | 73                       | /                        | /                                               | 85±1      |

<sup>a</sup> The concentrations of OH radicals in all experiments were calculated by Text S4.

161

162

163

164

165

**Table S2.** ESI-Orbitrap MS measured products in acetone SOA

| Measured Mass [M+H] <sup>+</sup> | Theory Mass | Suggested Formula                                             | Molecular Structure                                                                 | Seeds                                           | Ref.                  |
|----------------------------------|-------------|---------------------------------------------------------------|-------------------------------------------------------------------------------------|-------------------------------------------------|-----------------------|
| 72                               | 71          | C <sub>3</sub> H <sub>5</sub> NO                              | 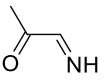   | (NH <sub>4</sub> ) <sub>2</sub> SO <sub>4</sub> | De Haan et al. (2019) |
| 163                              | 162         | C <sub>6</sub> H <sub>10</sub> O <sub>5</sub>                 |    |                                                 | Li et al. (2021b)     |
| 195                              | 194         | C <sub>9</sub> H <sub>10</sub> N <sub>2</sub> O <sub>3</sub>  |    |                                                 | Aiona et al. (2017)   |
| 235                              | 234         | C <sub>9</sub> H <sub>14</sub> O <sub>7</sub>                 |    |                                                 | Li et al. (2021b)     |
| 341                              | 340         | C <sub>15</sub> H <sub>20</sub> O <sub>7</sub> N <sub>2</sub> |    |                                                 | Aiona et al. (2017)   |
| 105                              | 104         | C <sub>3</sub> H <sub>4</sub> O <sub>4</sub>                  |   | Na <sub>2</sub> SO <sub>4</sub>                 | Altieri et al. (2008) |
| 119                              | 118         | C <sub>4</sub> H <sub>6</sub> O <sub>4</sub>                  |  |                                                 | Altieri et al. (2008) |
| 135                              | 134         | C <sub>4</sub> H <sub>6</sub> O <sub>5</sub>                  |  |                                                 | Altieri et al. (2008) |
| 161                              | 160         | C <sub>6</sub> H <sub>8</sub> O <sub>5</sub>                  |  |                                                 |                       |
| 179                              | 178         | C <sub>6</sub> H <sub>10</sub> O <sub>6</sub>                 |  |                                                 | Guzmán et al. (2006)  |
| 217                              | 216         | C <sub>9</sub> H <sub>12</sub> O <sub>6</sub>                 |  |                                                 | Zhao et al. (2006)    |
| 233                              | 232         | C <sub>9</sub> H <sub>12</sub> O <sub>7</sub>                 |  |                                                 | Tan et al. (2012)     |

166

167

168 **Table S3** Concentrations of total SOA formed in the chamber and that formed only  
 169 from the uptake of methylglyoxal (MGly) in the chamber

| Seed                                            | SOA <sup>a</sup><br>( $\mu\text{g m}^{-3}$ ) | Surface area<br>of seeds<br>( $\text{m}^2 \text{m}^{-3}$ ) | MGly<br>( $\mu\text{g m}^{-3}$ ) | $\gamma^b$           | SOA <sub>MGly</sub> <sup>c</sup><br>( $\mu\text{g m}^{-3}$ ) | SOA/SOA <sub>MGly</sub> |
|-------------------------------------------------|----------------------------------------------|------------------------------------------------------------|----------------------------------|----------------------|--------------------------------------------------------------|-------------------------|
| Na <sub>2</sub> SO <sub>4</sub>                 | 140                                          | $9.30 \times 10^{-3}$                                      | 26.74                            | $2.6 \times 10^{-4}$ | 17.17                                                        | 8.15                    |
| (NH <sub>4</sub> ) <sub>2</sub> SO <sub>4</sub> | 101                                          | $1.95 \times 10^{-2}$                                      | 42.95                            | $2.6 \times 10^{-4}$ | 28.88                                                        | 3.50                    |
| NH <sub>4</sub> HSO <sub>4</sub>                | 57                                           | $1.14 \times 10^{-2}$                                      | 38.43                            | $2.6 \times 10^{-4}$ | 20.17                                                        | 2.83                    |

170 <sup>a</sup>SOA values are the concentrations of SOA on different seeds observed in the experiments. <sup>b</sup>The  
 171 values of  $\gamma$  are consistent with the parameters of the irreversible uptake of MGly used in CMAQ  
 172 v5.3. <sup>c</sup>SOA<sub>MGly</sub> is estimated concentration of SOA formed from the irreversible uptake of MGly on  
 173 different aerosols.

174  
 175  
 176

177

178 **Reference:**

- 179 Aiona, P. K., Lee, H. J., Leslie, R., Lin, P., Laskin, A., Laskin, J., and Nizkorodov, S. A.: Photochemistry  
 180 of products of the aqueous reaction of methylglyoxal with ammonium sulfate, ACS Earth Space  
 181 Chem., 1, 522-532, 10.1021/acsearthspacechem.7b00075, 2017.
- 182 Altieri, K. E., Seitzinger, S. P., Carlton, A. G., Turpin, B. J., Klein, G. C., and Marshall, A. G.: Oligomers  
 183 formed through in-cloud methylglyoxal reactions: Chemical composition, properties, and  
 184 mechanisms investigated by ultra-high resolution FT-ICR mass spectrometry, Atmospheric  
 185 Environment, 42, 1476-1490, 10.1016/j.atmosenv.2007.11.015, 2008.
- 186 Bongartz, A., Schweighoefer, S., Roose, C., and Schurath, U.: The mass accommodation coefficient of  
 187 ammonia on water, Journal of Atmospheric Chemistry, 20, 35-58, 10.1007/bf01099917, 1995.
- 188 De Haan, D. O., Pajunoja, A., Hawkins, L. N., Welsh, H. G., Jimenez, N. G., De Loera, A., Zauscher, M.,  
 189 Andretta, A. D., Joyce, B. W., De Haan, A. C., Riva, M., Cui, T. Q., Surratt, J. D., Cazaunau, M.,  
 190 Formenti, P., Gratien, A., Pangui, E., and Doussin, J. F.: Methylamine's Effects on Methylglyoxal-  
 191 Containing Aerosol: Chemical, Physical, and Optical Changes, Acs Earth and Space Chemistry, 3,  
 192 1706-1716, 10.1021/acsearthspacechem.9b00103, 2019.
- 193 Fu, T. M., Jacob, D. J., Wittrock, F., Burrows, J. P., Vrekoussis, M., and Henze, D. K.: Global budgets of  
 194 atmospheric glyoxal and methylglyoxal, and implications for formation of secondary organic  
 195 aerosols, J. Geophys. Res.: Atmos., 113, D15303, 10.1029/2007jd009505, 2008.
- 196 Guo, H., Liu, J., Froyd, K. D., Roberts, J. M., Veres, P. R., Hayes, P. L., Jimenez, J. L., Nenes, A., and  
 197 Weber, R. J.: Fine particle pH and gas-particle phase partitioning of inorganic species in Pasadena,  
 198 California, during the 2010 CalNex campaign, Atmos. Chem. Phys., 17, 5703-5719, 10.5194/acp-  
 199 17-5703-2017, 2017.
- 200 Guzmán, M. I., Colussi, A. J., and Hoffmann, M. R.: Photoinduced Oligomerization of Aqueous Pyruvic  
 201 Acid, The Journal of Physical Chemistry A, 110, 3619-3626, 10.1021/jp056097z, 2006.
- 202 Huang, Y., Zhao, R., Charan, S. M., Kenseth, C. M., Zhang, X., and Seinfeld, J. H.: Unified theory of  
 203 vapor-wall mass transport in Teflon-walled environmental chambers, Environ. Sci. Technol., 52,  
 204 2134-2142, 10.1021/acs.est.7b05575, 2018.
- 205 Li, Y., Pöschl, U., and Shiraiwa, M.: Molecular corridors and parameterizations of volatility in the  
 206 chemical evolution of organic aerosols, Atmospheric Chemistry and Physics, 16, 3327-3344,

207 10.5194/acp-16-3327-2016, 2016.

208 Li, Y. X., Zhao, J. Y., Wang, Y., Seinfeld, J. H., and Zhang, R. Y.: Multigeneration production of secondary  
209 organic aerosol from toluene photooxidation, *Environ. Sci. Technol.*, 55, 8592-8603,  
210 10.1021/acs.est.1c02026, 2021a.

211 Li, Y. X., Ji, Y. M., Zhao, J. Y., Wang, Y., Shi, Q. J., Peng, J. F., Wang, Y. Y., Wang, C. Y., Zhang, F.,  
212 Wang, Y. X., Seinfeld, J. H., and Zhang, R. Y.: Unexpected oligomerization of small alpha-  
213 dicarbonyls for secondary organic aerosol and brown carbon formation, *Environ. Sci. Technol.*, 55,  
214 4430-4439, 10.1021/acs.est.0c08066, 2021b.

215 Liu, T. and Abbatt, J. P. D.: Oxidation of sulfur dioxide by nitrogen dioxide accelerated at the interface  
216 of deliquesced aerosol particles, *Nat. Chem.*, 13, 1173–1177, 10.1038/s41557-021-00777-0, 2021.

217 Liu, X., Wang, H., Wang, F., Lv, S., Wu, C., Zhao, Y., Zhang, S., Liu, S., Xu, X., Lei, Y., and Wang, G.:  
218 Secondary formation of atmospheric brown carbon in China haze: Implication for an enhancing role  
219 of ammonia, *Environ. Sci. Technol.*, 57, 11163-11172, 10.1021/acs.est.3c03948, 2023.

220 Nah, T., Guo, H., Sullivan, A. P., Chen, Y., Tanner, D. J., Nenes, A., Russell, A., Ng, N. L., Huey, L. G.,  
221 and Weber, R. J.: Characterization of aerosol composition, aerosol acidity, and organic acid  
222 partitioning at an agriculturally intensive rural southeastern US site, *Atmospheric Chemistry and  
223 Physics*, 18, 11471-11491, 10.5194/acp-18-11471-2018, 2018.

224 Seinfeld, J. H. and Pandis, S. N.: *ATMOSPHERIC CHEMISTRY AND PHYSICS: from air pollution to  
225 climate change*, John Wiley & Sons 2006.

226 Tan, Y., Lim, Y. B., Altieri, K. E., Seitzinger, S. P., and Turpin, B. J.: Mechanisms leading to oligomers  
227 and SOA through aqueous photooxidation: insights from OH radical oxidation of acetic acid and  
228 methylglyoxal, *Atmospheric Chemistry and Physics*, 12, 801-813, 10.5194/acp-12-801-2012, 2012.

229 Tang, M. J., Cox, R. A., and Kalberer, M.: Compilation and evaluation of gas phase diffusion coefficients  
230 of reactive trace gases in the atmosphere: volume 1. Inorganic compounds, *Atmospheric Chemistry  
231 and Physics*, 14, 9233-9247, 10.5194/acp-14-9233-2014, 2014.

232 Tang, M. J., Shiraiwa, M., Pöschl, U., Cox, R. A., and Kalberer, M.: Compilation and evaluation of gas  
233 phase diffusion coefficients of reactive trace gases in the atmosphere: Volume 2. Diffusivities of  
234 organic compounds, pressure-normalised mean free paths, and average Knudsen numbers for gas  
235 uptake calculations, *Atmospheric Chemistry and Physics*, 15, 5585-5598, 10.5194/acp-15-5585-  
236 2015, 2015.

237 Zhang, X., Cappa, C. D., Jathar, S. H., McVay, R. C., Ensberg, J. J., Kleeman, M. J., and Seinfeld, J. H.:  
238 Influence of vapor wall loss in laboratory chambers on yields of secondary organic aerosol, *Proc  
239 Natl Acad Sci U S A*, 111, 5802-5807, 10.1073/pnas.1404727111, 2014.

240 Zhao, J., Levitt, N. P., Zhang, R. Y., and Chen, J. M.: Heterogeneous reactions of methylglyoxal in acidic  
241 media: Implications for secondary organic aerosol formation, *Environmental Science & Technology*,  
242 40, 7682-7687, 10.1021/es060610k, 2006.

243
